# Supplementary material for: Ethnic and Geographic Differentiation of Helicobacter pylori within Iran
Source: PLoS One. 2010 Mar 22;5(3):e9645. doi: 10.1371/journal.pone.0009645 (PMC2842290; doi:10.1371/journal.pone.0009645)
Supplement: Table S1 — Sources of Iranian strains. (0.06 MB XLS) [file pone.0009645.s002.xls]

## Sheet: Sheet1
Strain ID	Age	Sex	Disease type	Area	Ethnic origion	Language family	Language high order subgroup	Language low order subgroup	Language	Geographical origion	Additional information of location
IRANL1	75	M	PU	Ardabil	Azeri	Altaic	Turkic	Southern	Azerbaijani	Northwest of Iran	High incidence region for gastric cancer
IRANL2	65	F	Antral gastritis	Ardabil	Azeri	Altaic	Turkic	Southern	Azerbaijani	Northwest of Iran	High incidence region for gastric cancer
IRANL3	75	M	Distal esophagus cancer	Ardabil	Azeri	Altaic	Turkic	Southern	Azerbaijani	Northwest of Iran	High incidence region for gastric cancer
IRANL4	50	M	Antral gastritis	Ardabil	Azeri	Altaic	Turkic	Southern	Azerbaijani	Northwest of Iran	High incidence region for gastric cancer
IRANL5	47	F	Antral atrophy	Ardabil	Azeri	Altaic	Turkic	Southern	Azerbaijani	Northwest of Iran	High incidence region for gastric cancer
IRANL6	-	M	Gastric body cancer	Ardabil	Azeri	Altaic	Turkic	Southern	Azerbaijani	Northwest of Iran	High incidence region for gastric cancer
IRANL7	55	M	DU	Ardabil	Azeri	Altaic	Turkic	Southern	Azerbaijani	Northwest of Iran	High incidence region for gastric cancer
IRANL8	68	M	Gastric cancer	Ardabil	Azeri	Altaic	Turkic	Southern	Azerbaijani	Northwest of Iran	High incidence region for gastric cancer
IRANL9	37	M	Normal EGD	Ardabil	Azeri	Altaic	Turkic	Southern	Azerbaijani	Northwest of Iran	High incidence region for gastric cancer
IRANL10	48	F	Normal EGD	Ardabil	Azeri	Altaic	Turkic	Southern	Azerbaijani	Northwest of Iran	High incidence region for gastric cancer
IRANL11	45	F	Normal EGD	Ardabil	Azeri	Altaic	Turkic	Southern	Azerbaijani	Northwest of Iran	High incidence region for gastric cancer
IRANL12	35	F	Normal EGD	Ardabil	Azeri	Altaic	Turkic	Southern	Azerbaijani	Northwest of Iran	High incidence region for gastric cancer
IRANL14	49	F	Normal EGD	Ardabil	Azeri	Altaic	Turkic	Southern	Azerbaijani	Northwest of Iran	High incidence region for gastric cancer
IRANL15	72	F	Normal EGD (gastric cancer relative)	Ardabil	Azeri	Altaic	Turkic	Southern	Azerbaijani	Northwest of Iran	High incidence region for gastric cancer
IRANL16	45	F	Normal EGD	Ardabil	Azeri	Altaic	Turkic	Southern	Azerbaijani	Northwest of Iran	High incidence region for gastric cancer
IRANL18	41	M	Normal EGD	Ardabil	Azeri	Altaic	Turkic	Southern	Azerbaijani	Northwest of Iran	High incidence region for gastric cancer
IRAN8-B	54	F	Normal EGD	Ardabil	Azeri	Altaic	Turkic	Southern	Azerbaijani	Northwest of Iran	High incidence region for gastric cancer
IRAN17-B	20	M	Normal EGD	Ardabil	Azeri	Altaic	Turkic	Southern	Azerbaijani	Northwest of Iran	High incidence region for gastric cancer
IRAN18-B	28	M	PU	Ardabil	Azeri	Altaic	Turkic	Southern	Azerbaijani	Northwest of Iran	High incidence region for gastric cancer
IRAN35-B	77	M	Non cardia cancer	Ardabil	Azeri	Altaic	Turkic	Southern	Azerbaijani	Northwest of Iran	High incidence region for gastric cancer
IRAN65-B	56	F	Malignant cardia ulcer	Ardabil	Azeri	Altaic	Turkic	Southern	Azerbaijani	Northwest of Iran	High incidence region for gastric cancer
IRANL19	47	M	DU (bulb deformity)	Guilan	Guilaki	Indo-European	Indo-Iranian	Iranian	Western	North of Iran	NA
IRANL20	27	M	DU (bulb deformity)	Guilan	Guilaki	Indo-European	Indo-Iranian	Iranian	Western	Northof Iran	NA
IRANL21	56	F	DU (severe deformity) + GERD A	Guilan	Guilaki	Indo-European	Indo-Iranian	Iranian	Western	Northof Iran	NA
IRANL22	41	M	DU	Guilan	Guilaki	Indo-European	Indo-Iranian	Iranian	Western	Northof Iran	NA
IRANL23	47	M	Antral gastritis + Duodenitis + GERD A	Guilan	Guilaki	Indo-European	Indo-Iranian	Iranian	Western	Northof Iran	NA
IRANL24	72	M	Gastric cancer	Guilan	Guilaki	Indo-European	Indo-Iranian	Iranian	Western	Northof Iran	NA
IRANL25	60	M	DU	Guilan	Guilaki	Indo-European	Indo-Iranian	Iranian	Western	Northof Iran	NA
IRANL26	72	M	Duodenitis	Guilan	Guilaki	Indo-European	Indo-Iranian	Iranian	Western	Northof Iran	NA
IRANL27	28	F	Erosion in antrum	Guilan	Guilaki	Indo-European	Indo-Iranian	Iranian	Western	Northof Iran	NA
IRANL28	70	M	Normal EGD	Guilan	Guilaki	Indo-European	Indo-Iranian	Iranian	Western	Northof Iran	NA
IRANL29	48	F	GERD C	Mazanderan	Mazanderani	Indo-European	Indo-Iranian	Iranian	Western	Northof Iran	NA
IRANL30	32	F	Gastritis	Mazanderan	Mazanderani	Indo-European	Indo-Iranian	Iranian	Western	Northof Iran	NA
IRANL31	60	F	Normal EGD	Mazanderan	Mazanderani	Indo-European	Indo-Iranian	Iranian	Western	Northof Iran	NA
IRANL32	66	M	DU	Mazanderan	Mazanderani	Indo-European	Indo-Iranian	Iranian	Western	Northof Iran	NA
IRANL33	38	M	Gastritis + GERD A	Mazanderan	Mazanderani	Indo-European	Indo-Iranian	Iranian	Western	Northof Iran	NA
IRANL34	39	M	DU + GERD A (4 yrs ago, eradication of H. pylori was done.)	Mazanderan	Mazanderani	Indo-European	Indo-Iranian	Iranian	Western	Northof Iran	NA
IRANL35	43	F	Antritis (gastric cancer relative-mother & sister suffering from GC)	Mazanderan	Mazanderani	Indo-European	Indo-Iranian	Iranian	Western	Northof Iran	NA
IRANL36	43	M	Gastric cancer	Mazanderan	Mazanderani	Indo-European	Indo-Iranian	Iranian	Western	Northof Iran	NA
IRANL127	70	M	Gastric cancer (proximal region)	Mazanderan	Mazanderani	Indo-European	Indo-Iranian	Iranian	Western	Northof Iran	NA
IRANL128	53	F	Erosive antral gastritis	Mazanderan	Mazanderani	Indo-European	Indo-Iranian	Iranian	Western	Northof Iran	NA
IRANL129	47	F	Normal EGD	Mazanderan	Mazanderani	Indo-European	Indo-Iranian	Iranian	Western	Northof Iran	NA
IRANL130	42	F	Normal EGD	Mazanderan	Mazanderani	Indo-European	Indo-Iranian	Iranian	Western	Northof Iran	NA
IRANL131	37	M	Normal EGD	Mazanderan	Mazanderani	Indo-European	Indo-Iranian	Iranian	Western	Northof Iran	NA
IRANL37	65	F	Gastritis	Kurdistan	Kurd	Indo-European	Indo-Iranian	Iranian	Western	West of Iran	NA
IRANL38	90	M	Esophagus cancer	Kurdistan	Kurd	Indo-European	Indo-Iranian	Iranian	Western	West of Iran	NA
IRANL39	67	F	Atrophic gastritis	Kurdistan	Kurd	Indo-European	Indo-Iranian	Iranian	Western	West of Iran	NA
IRANL40	38	F	DU	Kurdistan	Kurd	Indo-European	Indo-Iranian	Iranian	Western	West of Iran	NA
IRANL41	18	F	Bile reflux gastritis + submucosal nodularity in fundus and antrum	Kurdistan	Kurd	Indo-European	Indo-Iranian	Iranian	Western	West of Iran	NA
IRANL42	43	F	DU + GERD A (gastric cancer relative)	Kurdistan	Kurd	Indo-European	Indo-Iranian	Iranian	Western	West of Iran	NA
IRANL43	35	F	Bile reflux gastritis	Kurdistan	Kurd	Indo-European	Indo-Iranian	Iranian	Western	West of Iran	NA
IRANL44	32	F	Gastritis	Kurdistan	Kurd	Indo-European	Indo-Iranian	Iranian	Western	West of Iran	NA
IRANL45	27	F	Gastritis	Kurdistan	Kurd	Indo-European	Indo-Iranian	Iranian	Western	West of Iran	NA
IRANL73	80	M	DU	Kurdistan	Kurd	Indo-European	Indo-Iranian	Iranian	Western	West of Iran	NA
IRANL62	29	F	Antral gastritis	Kermanshah	Kurd	Indo-European	Indo-Iranian	Iranian	Western	West of Iran	NA
IRANL63	49	M	Antral gastritis	Kermanshah	Kurd	Indo-European	Indo-Iranian	Iranian	Western	West of Iran	NA
IRANL64	17	M	GERD D + Antral gastritis	Kermanshah	Kurd	Indo-European	Indo-Iranian	Iranian	Western	West of Iran	NA
IRANL65	38	M	DU + GERD B	Kermanshah	Kurd	Indo-European	Indo-Iranian	Iranian	Western	West of Iran	NA
IRANL66	45	F	Antral gastritis + Duodenitis	Kermanshah	Kurd	Indo-European	Indo-Iranian	Iranian	Western	West of Iran	NA
IRANL67	53	M	DU + Antral gastritis	Kermanshah	Kurd	Indo-European	Indo-Iranian	Iranian	Western	West of Iran	NA
IRANL68	53	M	DU	Kermanshah	Kurd	Indo-European	Indo-Iranian	Iranian	Western	West of Iran	NA
IRANL69	28	M	Antral gastritis	Kermanshah	Kurd	Indo-European	Indo-Iranian	Iranian	Western	West of Iran	NA
IRANL70	24	M	Antral gastritis + Duodenal polyp	Kermanshah	Kurd	Indo-European	Indo-Iranian	Iranian	Western	West of Iran	NA
IRANL71	70	M	DU	Kermanshah	Kurd	Indo-European	Indo-Iranian	Iranian	Western	West of Iran	NA
IRANL72	53	F	Gastritis	Kermanshah	Kurd	Indo-European	Indo-Iranian	Iranian	Western	West of Iran	NA
IRANL74	29	F	Antral gastritis	Kermanshah	Kurd	Indo-European	Indo-Iranian	Iranian	Western	West of Iran	NA
IRANL48	27	M	Non-erosive antral gastritis	Yazd	Fars	Indo-European	Indo-Iranian	Iranian	Western	South of Iran	Low incidence region for gastric cancer
IRANL49	27	F	Erosive antral gastritis	Yazd	Fars	Indo-European	Indo-Iranian	Iranian	Western	South of Iran	Low incidence region for gastric cancer
IRANL50	27	M	Erosive antral gastritis + Duodenitis (gastric cancer relative-mother suffering from GC)	Yazd	Fars	Indo-European	Indo-Iranian	Iranian	Western	South of Iran	Low incidence region for gastric cancer
IRANL51	42	M	GERD	Yazd	Fars	Indo-European	Indo-Iranian	Iranian	Western	South of Iran	Low incidence region for gastric cancer
IRANL52	54	F	Non-erosive antral gastritis	Yazd	Fars	Indo-European	Indo-Iranian	Iranian	Western	South of Iran	Low incidence region for gastric cancer
IRANL53	42	F	Non-erosive antral gastritis	Yazd	Fars	Indo-European	Indo-Iranian	Iranian	Western	South of Iran	Low incidence region for gastric cancer
IRANL54	54	M	DU	Yazd	Fars	Indo-European	Indo-Iranian	Iranian	Western	South of Iran	Low incidence region for gastric cancer
IRANL55	26	M	Erosive antral gastritis	Yazd	Fars	Indo-European	Indo-Iranian	Iranian	Western	South of Iran	Low incidence region for gastric cancer
IRANL56	71	M	DU	Yazd	Fars	Indo-European	Indo-Iranian	Iranian	Western	South of Iran	Low incidence region for gastric cancer
IRANL57	60	M	PU + Erosion in duodenum	Yazd	Fars	Indo-European	Indo-Iranian	Iranian	Western	South of Iran	Low incidence region for gastric cancer
IRANL58	31	M	GERD B	Yazd	Fars	Indo-European	Indo-Iranian	Iranian	Western	South of Iran	Low incidence region for gastric cancer
IRANL59	72	M	Erosive antral gastritis	Yazd	Fars	Indo-European	Indo-Iranian	Iranian	Western	South of Iran	Low incidence region for gastric cancer
IRANL60	75	F	Non-erosive antral gastritis	Yazd	Fars	Indo-European	Indo-Iranian	Iranian	Western	South of Iran	Low incidence region for gastric cancer
IRANL61	27	M	DU	Yazd	Fars	Indo-European	Indo-Iranian	Iranian	Western	South of Iran	Low incidence region for gastric cancer
IRANL621	56	F	Esophagus cancer	Khorasan Razavi	Fars	Indo-European	Indo-Iranian	Iranian	Western	Northeast of Iran	NA
IRANL631	27	F	Antral gastritis	Khorasan Razavi	Fars	Indo-European	Indo-Iranian	Iranian	Western	Northeast of Iran	NA
IRANL641	43	F	Normal EGD	Khorasan Razavi	Fars	Indo-European	Indo-Iranian	Iranian	Western	Northeast of Iran	NA
IRANL661	78	M	Antral gastritis	Khorasan Razavi	Fars	Indo-European	Indo-Iranian	Iranian	Western	Northeast of Iran	NA
IRANL671	29	F	Antral gastritis	Khorasan Razavi	Fars	Indo-European	Indo-Iranian	Iranian	Western	Northeast of Iran	NA
IRANL681	46	F	Esophagus cancer	Khorasan Razavi	Fars	Indo-European	Indo-Iranian	Iranian	Western	Northeast of Iran	NA
IRANL691	30	F	Antral gastritis	Khorasan Razavi	Fars	Indo-European	Indo-Iranian	Iranian	Western	Northeast of Iran	NA
IRANL701	44	M	Esophagitis	Khorasan Razavi	Fars	Indo-European	Indo-Iranian	Iranian	Western	Northeast of Iran	NA
IRANL711	32	F	Nodularity in corpus + sever erythma	Khorasan Razavi	Fars	Indo-European	Indo-Iranian	Iranian	Western	Northeast of Iran	NA
IRANL721	47	M	Normal EGD	Khorasan Razavi	Fars	Indo-European	Indo-Iranian	Iranian	Western	Northeast of Iran	NA
IRANL731	44	F	Normal EGD	Khorasan Razavi	Fars	Indo-European	Indo-Iranian	Iranian	Western	Northeast of Iran	NA
IRANL741	86	M	Esophagus cancer	Khorasan Razavi	Fars	Indo-European	Indo-Iranian	Iranian	Western	Northeast of Iran	NA
IRAN1KH	68	F	Gastritis	Khorasan Razavi	Fars	Indo-European	Indo-Iranian	Iranian	Western	Northeast of Iran	NA
IRAN2KH	48	M	NormalEGD	Khorasan Razavi	Fars	Indo-European	Indo-Iranian	Iranian	Western	Northeast of Iran	NA
IRAN3KH	18	M	NormalEGD	Khorasan Razavi	Fars	Indo-European	Indo-Iranian	Iranian	Western	Northeast of Iran	NA
IRAN4KH	36	F	GERD C	Khorasan Razavi	Fars	Indo-European	Indo-Iranian	Iranian	Western	Northeast of Iran	NA
IRAN5KH	22	M	Antral gastritis	Khorasan Razavi	Fars	Indo-European	Indo-Iranian	Iranian	Western	Northeast of Iran	NA
IRAN6KH	70	F	Esophagitis + severe reflux	Khorasan Razavi	Fars	Indo-European	Indo-Iranian	Iranian	Western	Northeast of Iran	NA
IRANL75	28	F	Normal EGD	Lorestan	Lor	Indo-European	Indo-Iranian	Iranian	Western	West of Iran	NA
IRANL76	50	F	Erosion in antrum	Lorestan	Lor	Indo-European	Indo-Iranian	Iranian	Western	West of Iran	NA
IRANL77	30	M	Bulb deformity and Erosion in antrum	Lorestan	Lor	Indo-European	Indo-Iranian	Iranian	Western	West of Iran	NA
IRANL78	78	M	PU (necrotic) + Extended erosion in fundus, corpus and antrum	Lorestan	Lor	Indo-European	Indo-Iranian	Iranian	Western	West of Iran	NA
IRANL79	21	M	Normal EGD	Lorestan	Lor	Indo-European	Indo-Iranian	Iranian	Western	West of Iran	NA
IRANL80	59	F	Nodular gastritis	Lorestan	Lor	Indo-European	Indo-Iranian	Iranian	Western	West of Iran	NA
IRANL81	59	F	Nodularity in corpus and antrum	Lorestan	Lor	Indo-European	Indo-Iranian	Iranian	Western	West of Iran	NA
IRANL82	45	F	Erosion in antrum + severe edema	Lorestan	Lor	Indo-European	Indo-Iranian	Iranian	Western	West of Iran	NA
IRANL83	45	M	Esophagus cancer	Lorestan	Lor	Indo-European	Indo-Iranian	Iranian	Western	West of Iran	NA
IRANL84	42	M	PU	Lorestan	Lor	Indo-European	Indo-Iranian	Iranian	Western	West of Iran	NA
IRANL85	58	M	Duodenitis	Kohgiluyeh & Boyerahmad	Lor	Indo-European	Indo-Iranian	Iranian	Western	Sothwest of Iran	NA
IRANL86	46	M	PU	Kohgiluyeh & Boyerahmad	Lor	Indo-European	Indo-Iranian	Iranian	Western	Sothwest of Iran	NA
IRANL87	20	F	Erosion in cardia and corpus	Kohgiluyeh & Boyerahmad	Lor	Indo-European	Indo-Iranian	Iranian	Western	Sothwest of Iran	NA
IRANL88	34	M	Erosion in corpus and antrum	Kohgiluyeh & Boyerahmad	Lor	Indo-European	Indo-Iranian	Iranian	Western	Sothwest of Iran	NA
IRANL89	30	M	DU	Kohgiluyeh & Boyerahmad	Lor	Indo-European	Indo-Iranian	Iranian	Western	Sothwest of Iran	NA
IRANL90	29	F	Erosion in cardia and antrum	Kohgiluyeh & Boyerahmad	Lor	Indo-European	Indo-Iranian	Iranian	Western	Sothwest of Iran	NA
IRANL91	36	F	Gastritis	Kohgiluyeh & Boyerahmad	Lor	Indo-European	Indo-Iranian	Iranian	Western	Sothwest of Iran	NA
IRANL97	76	M	Antral gastritis (bulb deformity in duodenum + nodularity in antrum)	Khuzestan	Arab	Afro-Asiatic	Semitic	Central	South	Sothwest of Iran	NA
IRANL98	45	M	Gastritis type B	Khuzestan	Arab	Afro-Asiatic	Semitic	Central	South	Sothwest of Iran	NA
IRANL99	65	M	Gastritis type B	Khuzestan	Arab	Afro-Asiatic	Semitic	Central	South	Sothwest of Iran	NA
IRANL100	29	M	Gastritis (nodularity in antrum)	Khuzestan	Arab	Afro-Asiatic	Semitic	Central	South	Sothwest of Iran	NA
IRANL101	26	M	DU	Khuzestan	Arab	Afro-Asiatic	Semitic	Central	South	Sothwest of Iran	NA
IRANL102	66	F	Gastritis (nodularity in antrum)	Khuzestan	Arab	Afro-Asiatic	Semitic	Central	South	Sothwest of Iran	NA
IRANL103	55	F	Gastritis + duodenitis	Khuzestan	Arab	Afro-Asiatic	Semitic	Central	South	Sothwest of Iran	NA
IRANL104	28	F	Antral gastritis + DU	Khuzestan	Arab	Afro-Asiatic	Semitic	Central	South	Sothwest of Iran	NA
IRANL105	38	M	Gastritis	Khuzestan	Arab	Afro-Asiatic	Semitic	Central	South	Sothwest of Iran	NA
IRANL106	24	M	Normal EGD	Khuzestan	Arab	Afro-Asiatic	Semitic	Central	South	Sothwest of Iran	NA
IRANL107	30	F	Normal EGD	Khuzestan	Arab	Afro-Asiatic	Semitic	Central	South	Sothwest of Iran	NA
IRANL108	28	F	Gastritis + duodenitis	Khuzestan	Arab	Afro-Asiatic	Semitic	Central	South	Sothwest of Iran	NA
IRANL109	23	F	Gastritis	Khuzestan	Arab	Afro-Asiatic	Semitic	Central	South	Sothwest of Iran	NA
IRANL110	32	F	Antral gastritis	Khuzestan	Arab	Afro-Asiatic	Semitic	Central	South	Sothwest of Iran	NA
IRANL111	60	F	Antral gastritis	Khuzestan	Arab	Afro-Asiatic	Semitic	Central	South	Sothwest of Iran	NA
IRANL112	24	M	Antral gastritis	Khuzestan	Arab	Afro-Asiatic	Semitic	Central	South	Sothwest of Iran	NA
IRANL124	28	M	Gastritis + duodenitis	Khuzestan	Arab	Afro-Asiatic	Semitic	Central	South	Sothwest of Iran	NA
IRANL125	36	F	Gastritis type B	Khuzestan	Arab	Afro-Asiatic	Semitic	Central	South	Sothwest of Iran	NA
IRANL126	59	F	Antral gastritis	Khuzestan	Arab	Afro-Asiatic	Semitic	Central	South	Sothwest of Iran	NA
IRANL132	63	F	GERD C	Khuzestan	Arab	Afro-Asiatic	Semitic	Central	South	Sothwest of Iran	NA
IRANL133	36	F	GERD A	Khuzestan	Arab	Afro-Asiatic	Semitic	Central	South	Sothwest of Iran	NA
IRANL134	33	M	Gastritis + duodenitis	Khuzestan	Arab	Afro-Asiatic	Semitic	Central	South	Sothwest of Iran	NA
IRANL114	35	F	Erosive duodenitis (gastric cancer relative-father suffering from GC)	Hormozghan	Fars	Indo-European	Indo-Iranian	Iranian	Western	South of Iran	NA
IRANL115	16	F	Non-erosive antral gastritis	Hormozghan	Fars	Indo-European	Indo-Iranian	Iranian	Western	South of Iran	NA
IRANL116	30	M	Gastritis	Hormozghan	Fars	Indo-European	Indo-Iranian	Iranian	Western	South of Iran	NA
IRANL117	20	F	Erosion in antrum	Hormozghan	Fars	Indo-European	Indo-Iranian	Iranian	Western	South of Iran	NA
IRANL118	28	M	Non-erosive antral gastritis	Hormozghan	Fars	Indo-European	Indo-Iranian	Iranian	Western	South of Iran	NA
IRANL119	25	M	Esophagus ulcer	Hormozghan	Fars	Indo-European	Indo-Iranian	Iranian	Western	South of Iran	NA
IRANL120	31	F	Non-erosive antral gastritis	Hormozghan	Fars	Indo-European	Indo-Iranian	Iranian	Western	South of Iran	NA
IRANL121	50	F	Non-erosive antral gastritis	Hormozghan	Fars	Indo-European	Indo-Iranian	Iranian	Western	South of Iran	NA
IRANL122	45	F	Non-erosive antral gastritis	Hormozghan	Fars	Indo-European	Indo-Iranian	Iranian	Western	South of Iran	NA
IRANL123	52	M	Non-erosive antral gastritis	Hormozghan	Fars	Indo-European	Indo-Iranian	Iranian	Western	South of Iran	NA
